# Supplementary material
Source: MDPI journal article supplement (https://www.mdpi.com/2073-4441/15/3/521)
Supplement: s1 [file s1]

Table S1 The LC<sub>50</sub> of zebrafish after exposure to cyantraniliprole at 24 and 96 hours

| Time (h) | Concentration (mg/L) | Mortality (%) | LC <sub>50</sub> (mg/L) | 95% confidence (mg/L) | Regression equation      |
|----------|----------------------|---------------|-------------------------|-----------------------|--------------------------|
| 24       | 3.0                  | 10            | 7.2                     | 7.1-8.3               | y=3.27x+2.19<br>R=0.9791 |
|          | 4.0                  | 26            |                         |                       |                          |
|          | 6.0                  | 38            |                         |                       |                          |
|          | 7.0                  | 40            |                         |                       |                          |
|          | 8.0                  | 52            |                         |                       |                          |
|          | 9.0                  | 62            |                         |                       |                          |
|          | 10.0                 | 74            |                         |                       |                          |
| 96       | 1.0                  | 20            | 3.5                     | 3.4-4.0               | y=1.78x+4.03<br>R=0.9812 |
|          | 2.0                  | 30            |                         |                       |                          |
|          | 2.5                  | 34            |                         |                       |                          |
|          | 3.0                  | 40            |                         |                       |                          |
|          | 3.5                  | 52            |                         |                       |                          |
|          | 4.0                  | 54            |                         |                       |                          |
|          | 4.5                  | 58            |                         |                       |                          |
|          | 5.0                  | 62            |                         |                       |                          |
|          | 5.5                  | 66            |                         |                       |                          |
|          | 6.0                  | 70            |                         |                       |                          |

Table S2 The up-regulated and down-regulated genes after exposure to cyantraniliprole

| gene_id            | gene_name         | gene_length | padj     |   |
|--------------------|-------------------|-------------|----------|---|
| ENSDARG00000043196 | rnase12           | 957         | 3.52E-20 | - |
| ENSDARG00000101754 | BX664622.1        | 8012        | 2.73E-17 | - |
| novel.327          | -                 | 5288        | 8.88E-15 | - |
| ENSDARG00000055751 | fosb              | 2802        | 2.84E-14 | - |
| ENSDARG00000071553 | zgc:171500        | 1795        | 4.18E-13 | - |
| novel.3569         | -                 | 864         | 1.06E-12 | - |
| ENSDARG00000090847 | si:ch211-209l18.4 | 3747        | 5.24E-10 | - |
| ENSDARG00000037421 | egr1              | 3158        | 5.24E-10 | - |
| ENSDARG00000100614 | zgc:171497        | 2241        | 4.07E-09 | - |
| novel.3564         | -                 | 3443        | 1.55E-08 | - |
| ENSDARG00000029695 | pgp               | 1684        | 7.50E-08 | - |
| ENSDARG00000036096 | smad3a            | 6173        | 7.50E-08 | - |
| novel.3042         | -                 | 2022        | 1.16E-07 | - |
| novel.2746         | -                 | 2693        | 1.92E-07 | - |
| ENSDARG00000045155 | phf5a             | 1103        | 2.46E-07 | - |
| ENSDARG00000045159 | zdhhc4            | 1698        | 6.70E-07 | - |
| novel.5086         | -                 | 1420        | 7.20E-07 | - |

|                    |                   |       |             |   |
|--------------------|-------------------|-------|-------------|---|
| novel.3565         | -                 | 2044  | 1.21E-06    | - |
| novel.3993         | -                 | 4726  | 1.61E-06    | - |
| ENSDARG00000056270 | atpaf2            | 1963  | 2.05E-06    | - |
| ENSDARG00000056079 | l3mbtl2           | 5929  | 2.45E-06    | - |
| novel.2012         | -                 | 1078  | 2.46E-06    | - |
| ENSDARG00000045167 | dlgap5            | 3267  | 2.90E-06    | - |
| ENSDARG00000051892 | kcng4b            | 1608  | 3.08E-06    | - |
| ENSDARG00000078132 | tex2l             | 3879  | 5.13E-06    | - |
| ENSDARG00000056374 | noxo1b            | 2169  | 6.21E-06    | - |
| novel.5453         | -                 | 1698  | 6.21E-06    | - |
| ENSDARG00000103371 | si:dkey-190j3.6   | 1393  | 6.36E-06    | - |
| ENSDARG00000056559 | ccz1              | 2080  | 8.84E-06    | - |
| novel.4150         | -                 | 2768  | 9.18E-06    | - |
| ENSDARG00000098663 | fgf19             | 1032  | 1.12E-05    | - |
| ENSDARG00000093111 | si:ch211-209l18.2 | 2023  | 2.08E-05    | - |
| ENSDARG00000017565 | itk               | 2752  | 2.24E-05    | - |
| ENSDARG00000003167 | mlst8             | 4154  | 3.15E-05    | - |
| novel.1172         | -                 | 1529  | 3.42E-05    | - |
| ENSDARG00000095786 | AL928685.1        | 664   | 3.98E-05    | - |
| novel.2130         | -                 | 11258 | 4.38E-05    | - |
| novel.5422         | -                 | 1073  | 4.72E-05    | - |
| ENSDARG00000070714 | zgc:173544        | 6916  | 4.91E-05    | - |
| ENSDARG00000095918 | si:ch211-274k16.9 | 1659  | 4.96E-05    | - |
| ENSDARG00000068431 | si:ch211-195h23.3 | 1830  | 5.30E-05    | - |
| ENSDARG00000092833 | CR318588.2        | 1646  | 5.72E-05    | - |
| novel.5084         | -                 | 699   | 5.95E-05    | - |
| novel.2741         | -                 | 1189  | 6.02E-05    | - |
| novel.5408         | -                 | 3732  | 6.10E-05    | - |
| ENSDARG00000074779 | alms1             | 7106  | 6.18E-05    | - |
| novel.3580         | -                 | 7456  | 6.61E-05    | - |
| ENSDARG00000101633 | LO017682.1        | 1578  | 9.03E-05    | - |
| novel.470          | -                 | 1918  | 9.94E-05    | - |
| ENSDARG00000093411 | gad1a             | 1806  | 0.000151107 | - |
| ENSDARG00000091234 | si:ch73-335l21.4  | 1499  | 0.000157439 | - |
| ENSDARG00000039117 | tefa              | 2932  | 0.00025562  | - |
| novel.7027         | -                 | 1441  | 0.000330981 | - |
| novel.4121         | -                 | 2352  | 0.000330981 | - |
| novel.972          | -                 | 1027  | 0.000330981 | - |
| novel.3567         | -                 | 4472  | 0.000336612 | - |
| novel.4940         | -                 | 1542  | 0.000413556 | - |
| novel.6725         | -                 | 6040  | 0.000425112 | - |
| novel.5345         | -                 | 1398  | 0.000427007 | - |

|                    |                  |      |             |   |
|--------------------|------------------|------|-------------|---|
| ENSDARG00000070239 | kn11             | 5496 | 0.00046238  | - |
| novel.586          | -                | 7051 | 0.000501795 | - |
| ENSDARG00000104083 | adgre5b.2        | 2301 | 0.000514184 | - |
| ENSDARG00000069018 | cyp7a1           | 1987 | 0.000551665 | - |
| ENSDARG00000099216 | atp8b2           | 1311 | 0.000648059 | - |
| ENSDARG00000104890 | si:dkey-82i20.1  | 3376 | 0.000786786 | - |
| ENSDARG00000056059 | rangap1b         | 2514 | 0.000805467 | - |
| ENSDARG00000073820 | zgc:174917       | 2365 | 0.000858948 | - |
| ENSDARG00000105562 | si:dkey-23i12.7  | 1843 | 0.000875191 | - |
| ENSDARG00000099399 | thrsp            | 474  | 0.000875191 | - |
| ENSDARG00000099949 | FP236551.1       | 2442 | 0.000881862 | - |
| novel.1480         | -                | 1630 | 0.000926187 | - |
| ENSDARG00000013576 | gadd45bb         | 1485 | 0.001009169 | - |
| novel.5629         | -                | 8204 | 0.00125717  | - |
| novel.2788         | -                | 5984 | 0.00125717  | - |
| novel.2146         | -                | 1437 | 0.001628365 | - |
| novel.6129         | -                | 957  | 0.001839388 | - |
| novel.4159         | -                | 1340 | 0.00204759  | - |
| ENSDARG00000095719 | si:dkey-222h21.2 | 3116 | 0.002163224 | - |
| novel.2082         | -                | 373  | 0.00217495  | - |
| ENSDARG00000093354 | si:ch211-57i17.2 | 2453 | 0.003035222 | - |
| ENSDARG00000114332 | CT573234.1       | 4889 | 0.003035222 | - |
| novel.582          | -                | 965  | 0.003035222 | - |
| novel.4116         | -                | 2336 | 0.003406831 | - |
| ENSDARG00000075826 | msh4             | 3920 | 0.003539271 | - |
| novel.4841         | -                | 875  | 0.00392341  | - |
| ENSDARG00000045522 | acot15           | 2060 | 0.004295054 | - |
| ENSDARG00000019307 | dusp5            | 1522 | 0.004313322 | - |
| ENSDARG00000094344 | si:dkey-222h21.8 | 3154 | 0.004465474 | - |
| ENSDARG00000079933 | si:dkey-5g14.1   | 1953 | 0.004609486 | - |
| novel.711          | -                | 4232 | 0.004609486 | - |
| ENSDARG00000099583 | CABZ01034082.1   | 3434 | 0.004652736 | - |
| ENSDARG00000056590 | calca            | 1673 | 0.004751947 | - |
| novel.4340         | -                | 3280 | 0.004780726 | - |
| novel.5905         | -                | 1554 | 0.004917421 | - |
| novel.6949         | -                | 741  | 0.004920626 | - |
| ENSDARG00000076126 | actc1a           | 1425 | 0.00493431  | - |
| novel.2782         | -                | 8167 | 0.005160108 | - |
| novel.2101         | -                | 661  | 0.005429641 | - |
| ENSDARG00000059246 | hnrnpd           | 2723 | 0.005659325 | - |
| ENSDARG00000100311 | si:dkey-165e24.1 | 4316 | 0.005659325 | - |
| ENSDARG00000035562 | mpdu1a           | 2689 | 0.005776765 | - |

|                    |                   |      |             |   |
|--------------------|-------------------|------|-------------|---|
| ENSDARG00000002745 | tdh               | 2382 | 0.005914487 | - |
| ENSDARG00000069865 | grxcr1            | 989  | 0.006004955 | - |
| novel.2137         | -                 | 1136 | 0.006004955 | - |
| ENSDARG00000068732 | spry4             | 3447 | 0.006004955 | - |
| ENSDARG00000103324 | si:ch211-127b6.2  | 5416 | 0.006115068 | - |
| novel.4865         | -                 | 3052 | 0.006301165 | - |
| ENSDARG00000019651 | zgc:162239        | 1099 | 0.006470279 | - |
| novel.3570         | -                 | 1534 | 0.006470279 | - |
| novel.4016         | -                 | 2380 | 0.006929516 | - |
| ENSDARG00000059003 | strip2            | 4892 | 0.007088087 | - |
| novel.5454         | -                 | 1563 | 0.007221195 | - |
| ENSDARG00000069095 | gls2a             | 1858 | 0.0072768   | - |
| ENSDARG00000079191 | zgc:172122        | 1610 | 0.007348352 | - |
| novel.5976         | -                 | 1868 | 0.007660519 | - |
| novel.7325         | -                 | 1470 | 0.007660519 | - |
| ENSDARG00000079549 | cdc42ep1a         | 2145 | 0.007832676 | - |
| ENSDARG00000105507 | zgc:112234        | 652  | 0.007952304 | - |
| ENSDARG00000095236 | CT990618.1        | 2866 | 0.007965495 | - |
| novel.1215         | -                 | 1936 | 0.007984598 | - |
| novel.5406         | -                 | 5079 | 0.008117643 | - |
| ENSDARG00000075045 | cxcl18b           | 1101 | 0.008150625 | - |
| ENSDARG00000090338 | fam20cb           | 2523 | 0.008387836 | - |
| ENSDARG00000078625 | fgf9              | 428  | 0.008503122 | - |
| ENSDARG00000095840 | CU929426.1        | 742  | 0.008539144 | - |
| novel.6788         | -                 | 1244 | 0.008977441 | - |
| ENSDARG00000058357 | ankrd33ba         | 1994 | 0.01014907  | - |
| novel.368          | -                 | 6279 | 0.010250542 | - |
| ENSDARG00000052470 | igfbp2a           | 1748 | 0.010250542 | - |
| ENSDARG00000052343 | spata18           | 3175 | 0.010250542 | - |
| novel.5273         | -                 | 3117 | 0.010250542 | - |
| ENSDARG00000076106 | flr43             | 2037 | 0.011641579 | - |
| ENSDARG00000006588 | zgc:111983        | 2242 | 0.011641579 | - |
| ENSDARG00000039269 | arg2              | 2257 | 0.013219824 | - |
| ENSDARG00000041323 | csdc2a            | 1348 | 0.013746158 | - |
| ENSDARG00000037874 | cyp3c2            | 1699 | 0.013791068 | - |
| ENSDARG00000044098 | egr2a             | 2325 | 0.01402059  | - |
| novel.4710         | -                 | 1901 | 0.014123651 | - |
| novel.5409         | -                 | 2509 | 0.014559062 | - |
| ENSDARG00000102225 | si:ch211-205a14.7 | 3545 | 0.014650037 | - |
| ENSDARG00000056477 | ccdc125           | 1494 | 0.014662287 | - |
| novel.2786         | -                 | 8826 | 0.014662287 | - |
| ENSDARG00000051890 | hp                | 3296 | 0.014757183 | - |

|                    |                  |       |             |   |
|--------------------|------------------|-------|-------------|---|
| ENSDARG00000104231 | opn9             | 2166  | 0.015397928 | - |
| ENSDARG00000020133 | jdp2b            | 2366  | 0.015513805 | - |
| novel.6721         | -                | 6435  | 0.015539859 | - |
| novel.4153         | -                | 3650  | 0.01665141  | - |
| novel.2107         | -                | 741   | 0.01665141  | - |
| ENSDARG00000055075 | svila            | 10218 | 0.016794869 | - |
| ENSDARG00000026925 | nos2a            | 4149  | 0.016803571 | - |
| ENSDARG00000078247 | vip              | 1109  | 0.016886531 | - |
| novel.6722         | -                | 1750  | 0.017402045 | - |
| ENSDARG00000101514 | ftt64            | 3414  | 0.018346117 | - |
| ENSDARG00000088825 | citb             | 4749  | 0.019186972 | - |
| novel.2793         | -                | 1660  | 0.01932397  | - |
| ENSDARG00000037097 | slc7a2           | 4199  | 0.019433614 | - |
| novel.4289         | -                | 8247  | 0.019433614 | - |
| novel.2086         | -                | 499   | 0.019446171 | - |
| ENSDARG00000062971 | sdhaf2           | 2373  | 0.019591233 | - |
| ENSDARG00000103218 | BX927130.3       | 3090  | 0.019763125 | - |
| novel.6728         | -                | 4874  | 0.020239513 | - |
| ENSDARG00000000796 | nr4a1            | 5776  | 0.020239513 | - |
| ENSDARG00000060397 | hhip             | 4784  | 0.020239513 | - |
| novel.2200         | -                | 2109  | 0.020659064 | - |
| ENSDARG00000045672 | il26             | 639   | 0.021462344 | - |
| novel.6637         | -                | 2566  | 0.022178208 | - |
| novel.7305         | -                | 2393  | 0.023166995 | - |
| ENSDARG00000055752 | npas4a           | 4736  | 0.02362949  | - |
| ENSDARG00000030465 | tmem263          | 4719  | 0.02362949  | - |
| novel.5774         | -                | 2099  | 0.023992679 | - |
| novel.3459         | -                | 8236  | 0.024033654 | - |
| novel.4089         | -                | 2659  | 0.025182178 | - |
| novel.2783         | -                | 2130  | 0.025894296 | - |
| ENSDARG00000097503 | si:ch73-288o11.5 | 1222  | 0.025931935 | - |
| ENSDARG00000100006 | si:ch211-76m11.5 | 5157  | 0.026485039 | - |
| ENSDARG00000109749 | si:ch211-162i8.7 | 1171  | 0.026485039 | - |
| ENSDARG00000099470 | muc5.3           | 17245 | 0.026485039 | - |
| novel.5733         | -                | 4304  | 0.026485039 | - |
| ENSDARG00000074806 | afap112          | 4204  | 0.026572043 | - |
| novel.3279         | -                | 1878  | 0.027273807 | - |
| ENSDARG00000078768 | abhd15a          | 4369  | 0.029352944 | - |
| novel.6789         | -                | 1474  | 0.029493022 | - |
| ENSDARG00000020455 | si:ch211-171h4.3 | 1902  | 0.030332004 | - |
| novel.4233         | -                | 3133  | 0.030332004 | - |
| ENSDARG00000006409 | mapk12b          | 1695  | 0.031533907 | - |

|                    |                   |       |             |   |
|--------------------|-------------------|-------|-------------|---|
| ENSDARG00000020258 | ewsr1a            | 3035  | 0.031920698 | - |
| novel.2091         | -                 | 396   | 0.031920698 | - |
| ENSDARG00000101997 | si:dkey-191j3.2   | 5959  | 0.034026936 | - |
| ENSDARG00000104540 | cyp2aa8           | 5478  | 0.034104231 | - |
| ENSDARG00000035694 | stm               | 3344  | 0.034104231 | - |
| ENSDARG00000007371 | slc26a3.1         | 2244  | 0.034104231 | - |
| ENSDARG00000033029 | pkd1b             | 11674 | 0.035235061 | - |
| ENSDARG00000002764 | miox              | 1311  | 0.03618316  | - |
| novel.5401         | -                 | 3618  | 0.03618316  | - |
| novel.2110         | -                 | 2684  | 0.03618316  | - |
| ENSDARG00000076056 | si:ch211-286f9.2  | 1148  | 0.036663254 | - |
| novel.92           | -                 | 1485  | 0.036663254 | - |
| ENSDARG00000101353 | fl3b              | 876   | 0.038426815 | - |
| ENSDARG00000099466 | si:dkey-190j3.2   | 805   | 0.038426815 | - |
| novel.6825         | -                 | 1304  | 0.0399858   | - |
| ENSDARG00000068876 | zgc:153031        | 3094  | 0.0399858   | - |
| novel.3370         | -                 | 1260  | 0.0399858   | - |
| ENSDARG00000035632 | ccl19a.2          | 610   | 0.040880926 | - |
| ENSDARG00000038288 | cd151             | 1865  | 0.040979543 | - |
| ENSDARG00000056888 | dnah5l            | 13897 | 0.041063101 | - |
| novel.4725         | -                 | 1128  | 0.041251109 | - |
| ENSDARG00000002696 | gnb3b             | 2642  | 0.041355838 | - |
| ENSDARG00000117011 | ewsr1b            | 1311  | 0.041476355 | - |
| ENSDARG00000058389 | ccl19a.1          | 1733  | 0.0418485   | - |
| ENSDARG00000102292 | CU013526.1        | 541   | 0.042165158 | - |
| ENSDARG00000011797 | fam46bb           | 2981  | 0.04276722  | - |
| ENSDARG00000078451 | gzm3              | 802   | 0.042832706 | - |
| novel.2183         | -                 | 1918  | 0.044028402 | - |
| ENSDARG00000061948 | amotl2b           | 2985  | 0.044061748 | - |
| ENSDARG00000058480 | chtf18            | 3982  | 0.044216421 | - |
| ENSDARG00000113826 | si:ch211-223k15.1 | 7581  | 0.044287232 | - |
| ENSDARG00000104919 | si:ch211-153b23.3 | 3256  | 0.044486918 | - |
| ENSDARG00000091926 | si:dkey-103e21.5  | 1203  | 0.04519383  | - |
| ENSDARG00000115041 | flr50             | 1239  | 0.046007432 | - |
| ENSDARG00000037056 | zte38             | 1411  | 0.046007432 | - |
| ENSDARG00000024759 | inhbab            | 4118  | 0.046400111 | - |
| ENSDARG00000060622 | si:ch73-14h1.2    | 2899  | 0.046641756 | - |
| novel.1618         | -                 | 435   | 0.046641756 | - |
| ENSDARG00000102440 | CABZ01070852.1    | 3258  | 0.046837199 | - |
| ENSDARG00000025428 | socs3a            | 1935  | 0.047211086 | - |
| ENSDARG00000114306 | BX248108.1        | 1761  | 0.047211086 | - |
| ENSDARG00000011171 | si:ch211-12m10.1  | 11720 | 0.047575259 | - |

|                    |                   |      |             |   |
|--------------------|-------------------|------|-------------|---|
| ENSDARG00000079143 | si:ch73-278m9.1   | 1012 | 0.04896424  | - |
| novel.5874         | -                 | 1973 | 5.71E-09    | + |
| novel.5858         | -                 | 2764 | 9.00E-08    | + |
| novel.4186         | -                 | 745  | 2.46E-07    | + |
| ENSDARG00000019239 | cull1a            | 3711 | 4.23E-07    | + |
| ENSDARG00000068575 | tmem51a           | 2311 | 1.07E-06    | + |
| novel.1278         | -                 | 4546 | 1.43E-06    | + |
| ENSDARG00000023583 | coq9              | 1387 | 1.76E-06    | + |
| novel.5708         | -                 | 626  | 1.76E-06    | + |
| novel.6664         | -                 | 1699 | 1.99E-06    | + |
| novel.989          | -                 | 385  | 2.50E-06    | + |
| novel.1279         | -                 | 1020 | 6.72E-06    | + |
| ENSDARG00000090623 | si:dkeyp-106c3.1  | 6581 | 6.74E-06    | + |
| novel.1280         | -                 | 793  | 9.65E-06    | + |
| novel.1292         | -                 | 1712 | 1.52E-05    | + |
| novel.1281         | -                 | 643  | 2.14E-05    | + |
| ENSDARG00000094779 | si:dkey-192d15.1  | 2717 | 3.69E-05    | + |
| novel.5270         | -                 | 1756 | 4.60E-05    | + |
| ENSDARG00000041068 | got2a             | 2573 | 4.88E-05    | + |
| novel.5251         | -                 | 3135 | 6.60E-05    | + |
| ENSDARG00000092890 | si:ch73-44m9.5    | 496  | 7.25E-05    | + |
| ENSDARG00000076923 | kazna             | 2910 | 9.03E-05    | + |
| ENSDARG00000062054 | cpt1ab            | 5280 | 9.19E-05    | + |
| novel.4261         | -                 | 2925 | 0.00015512  | + |
| ENSDARG00000092520 | si:dkey-250k15.10 | 1225 | 0.000257968 | + |
| ENSDARG00000042045 | hmg20b            | 4815 | 0.00028525  | + |
| novel.4096         | -                 | 2637 | 0.000296755 | + |
| ENSDARG00000032102 | prdx3             | 1523 | 0.000330593 | + |
| novel.6662         | -                 | 4762 | 0.000330981 | + |
| ENSDARG00000026941 | fbx14             | 3130 | 0.000406551 | + |
| ENSDARG00000071036 | si:dkey-286j15.3  | 1080 | 0.000509153 | + |
| ENSDARG00000034403 | zgc:173443        | 920  | 0.000513111 | + |
| ENSDARG00000044566 | fabp6             | 508  | 0.000531893 | + |
| novel.426          | -                 | 1310 | 0.0005344   | + |
| novel.6663         | -                 | 4224 | 0.000786786 | + |
| ENSDARG00000004402 | elovl6            | 2062 | 0.000814271 | + |
| novel.6614         | -                 | 3089 | 0.000969364 | + |
| ENSDARG00000113433 | zgc:158316        | 1493 | 0.000979123 | + |
| ENSDARG00000056551 | slc22a13a         | 1781 | 0.001322099 | + |
| novel.1353         | -                 | 476  | 0.001472292 | + |
| novel.5856         | -                 | 4999 | 0.001567591 | + |
| novel.3007         | -                 | 4437 | 0.001628365 | + |

|                    |                   |      |             |   |
|--------------------|-------------------|------|-------------|---|
| ENSDARG00000101051 | ctsb              | 2097 | 0.001628365 | + |
| ENSDARG00000078177 | cxcr3.1           | 1038 | 0.001682643 | + |
| novel.2679         | -                 | 792  | 0.001800828 | + |
| ENSDARG00000099241 | ppp2cb            | 2021 | 0.002163224 | + |
| ENSDARG00000012796 | hnmt              | 1042 | 0.003067015 | + |
| ENSDARG00000100865 | si:dkey-269o24.1  | 3516 | 0.004295054 | + |
| ENSDARG00000020292 | si:ch211-254n4.3  | 1951 | 0.004295054 | + |
| ENSDARG00000099384 | si:dkey-238k10.1  | 1006 | 0.004313021 | + |
| ENSDARG00000079657 | si:dkey-53k12.1   | 681  | 0.004335001 | + |
| novel.3213         | -                 | 1791 | 0.004537123 | + |
| novel.5860         | -                 | 4292 | 0.004586848 | + |
| ENSDARG00000008948 | zgc:123275        | 2315 | 0.004917421 | + |
| novel.5264         | -                 | 1677 | 0.005042901 | + |
| novel.5249         | -                 | 619  | 0.005396005 | + |
| novel.5353         | -                 | 3004 | 0.005659325 | + |
| novel.4385         | -                 | 744  | 0.005659325 | + |
| novel.214          | -                 | 301  | 0.006004955 | + |
| novel.5855         | -                 | 5119 | 0.006324592 | + |
| ENSDARG00000103241 | CR381673.2        | 747  | 0.006442821 | + |
| novel.3845         | -                 | 2446 | 0.006470279 | + |
| novel.4381         | -                 | 3434 | 0.006657043 | + |
| ENSDARG00000023203 | mhc1lda           | 3093 | 0.006657043 | + |
| ENSDARG00000099796 | si:dkey-285b23.3  | 1780 | 0.007660519 | + |
| novel.4331         | -                 | 799  | 0.007920234 | + |
| ENSDARG00000077571 | zgc:174862        | 4772 | 0.00823281  | + |
| novel.1272         | -                 | 1590 | 0.008562538 | + |
| novel.1273         | -                 | 7244 | 0.009545795 | + |
| novel.5877         | -                 | 1586 | 0.01014907  | + |
| novel.3364         | -                 | 932  | 0.012809026 | + |
| ENSDARG00000095822 | BX324132.2        | 1145 | 0.013219824 | + |
| novel.3191         | -                 | 1475 | 0.013330067 | + |
| ENSDARG00000113899 | zgc:77650         | 4788 | 0.01402059  | + |
| novel.5352         | -                 | 2507 | 0.014510275 | + |
| ENSDARG00000093279 | si:dkey-11o1.3    | 1479 | 0.014559062 | + |
| ENSDARG00000018002 | ecil              | 1131 | 0.014700051 | + |
| ENSDARG00000057173 | ifit8             | 2136 | 0.018346117 | + |
| ENSDARG00000099525 | si:ch1073-13h15.3 | 1845 | 0.018346117 | + |
| ENSDARG00000056376 | ankrd37           | 1076 | 0.018730686 | + |
| novel.3212         | -                 | 2090 | 0.019446171 | + |
| novel.6577         | -                 | 1434 | 0.019942037 | + |
| novel.3229         | -                 | 3528 | 0.022397813 | + |
| ENSDARG00000056226 | creb3l3a          | 2158 | 0.02244502  | + |



|                    |                    |       |             |   |
|--------------------|--------------------|-------|-------------|---|
| ENSDARG00000053215 | me1                | 2475  | 0.024413276 | + |
| novel.6582         | -                  | 1943  | 0.025392154 | + |
| ENSDARG00000013794 | klf11b             | 2064  | 0.029393672 | + |
| ENSDARG00000060594 | hadhab             | 3133  | 0.029493022 | + |
| novel.3231         | -                  | 6342  | 0.030332004 | + |
| novel.3226         | -                  | 10693 | 0.031920698 | + |
| ENSDARG00000104367 | zgc:194469         | 4824  | 0.031920698 | + |
| ENSDARG00000030163 | cdk21              | 939   | 0.035017211 | + |
| ENSDARG00000008287 | fam114a1           | 2273  | 0.035017211 | + |
| ENSDARG00000087873 | eevs               | 1887  | 0.035017211 | + |
| novel.2579         | -                  | 2644  | 0.035017211 | + |
| novel.4997         | -                  | 1466  | 0.03558161  | + |
| novel.3211         | -                  | 4205  | 0.03558161  | + |
| ENSDARG00000056090 | capza1b            | 2708  | 0.035733149 | + |
| ENSDARG00000096990 | si:ch1073-340i21.2 | 1319  | 0.03618316  | + |
| novel.7361         | -                  | 1551  | 0.036185889 | + |
| ENSDARG00000104593 | cyp2k18            | 2335  | 0.037672729 | + |
| novel.4229         | -                  | 1712  | 0.037926502 | + |
| novel.6264         | -                  | 1573  | 0.038559261 | + |
| novel.5175         | -                  | 2760  | 0.0399858   | + |
| novel.3225         | -                  | 3575  | 0.041063101 | + |
| ENSDARG00000094131 | fr19               | 2032  | 0.042165158 | + |
| novel.1949         | -                  | 1824  | 0.042165158 | + |
| novel.6666         | -                  | 1077  | 0.044287232 | + |
| novel.4792         | -                  | 569   | 0.044386894 | + |
| ENSDARG00000029432 | tph1a              | 1977  | 0.044486918 | + |
| novel.3184         | -                  | 5690  | 0.044658694 | + |
| novel.6806         | -                  | 2116  | 0.044811242 | + |
| ENSDARG00000008931 | renbp              | 1889  | 0.04519383  | + |
| ENSDARG00000022614 | ddx43              | 2518  | 0.04519383  | + |
| novel.4525         | -                  | 1372  | 0.046641756 | + |
| novel.3983         | -                  | 4199  | 0.049735747 | + |

---
